# Supplementary material
Source: publisher site journal article supplement (https://spandidos-publications.com/991/downloadSupplementary)

Figure S1. Effect of HER4 knockdown on mRNA of CRC cells was confirmed by real-time PCR. shRNA, short hairpin RNA; nc-shRNA, negative control short hairpin RNA.

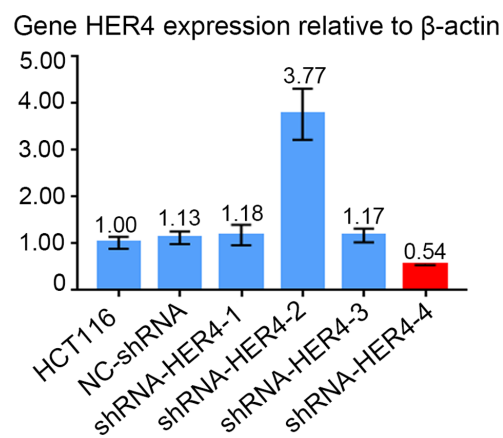

Figure S2. Effect of HER4 knockdown on CRC cells was confirmed by western blotting. Left: Representative images, right: Quantification. \* $P < 0.05$ . shRNA, short hairpin RNA; nc-shRNA, negative control short hairpin RNA.

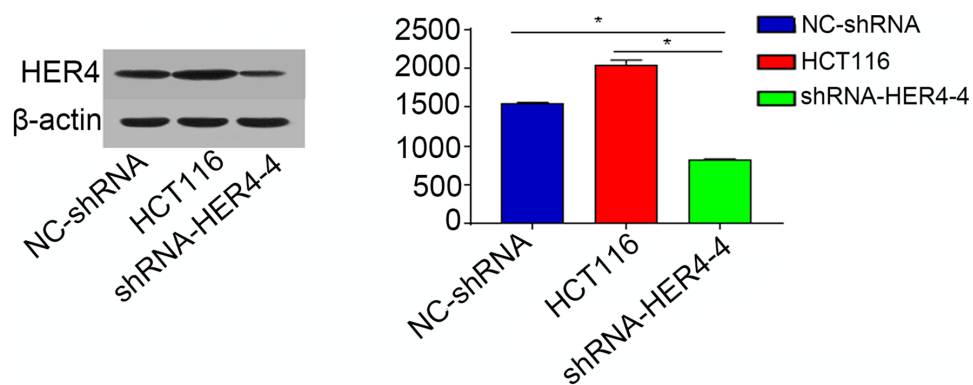

Figure S3. HER4 expression in the cell membrane, cytoplasm and nucleus in colorectal cancer cells. Normal colorectal tissue was used as a control for this experiment (data not shown). Magnification, x200.

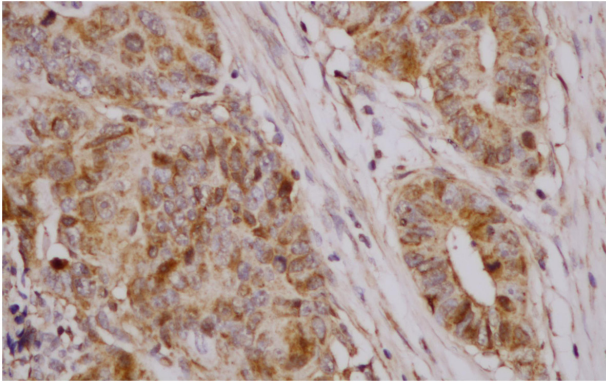

Supplement: Supplementary file 1 [file downloadSupplementary]
